# Supplementary material for: The effect of the oxidation environment on the activity and selectivity to aromatics and octenes over cobalt molybdate in the oxidative dehydrogenation of n-octane
Source: Royal Society of Chemistry journal article supplement (doi:10.1039/c4cy00812j), 2014-01-01
Supplement: c4cy00812j1.pdf [file c4cy00812j1.pdf]

### Supporting information

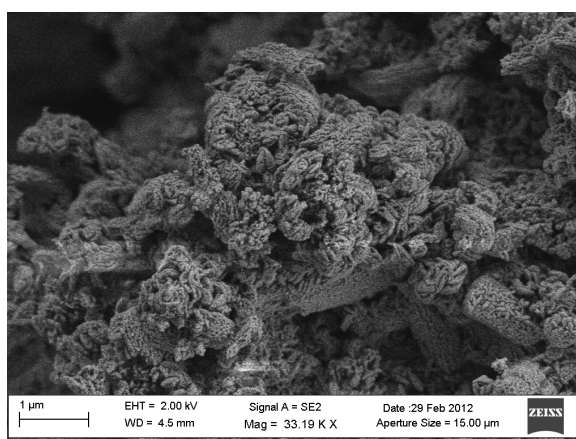

S 1: SEM image of the cobalt molybdate catalyst, showing the presence of both cobalt molybdate and molybdenum trioxide.

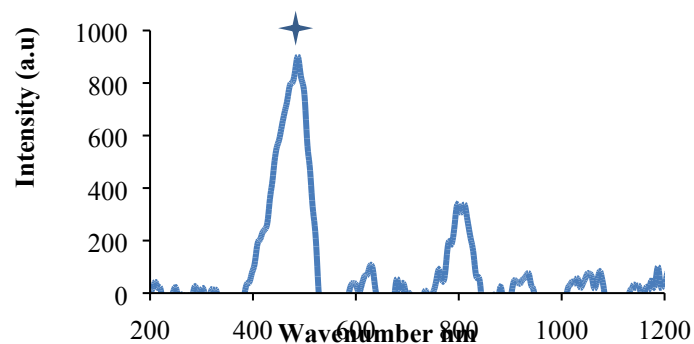

S 2: Raman spectrum of the used catalyst under *n*-octane at an 8:0 C:O ratio at 4000 h<sup>-1</sup>, ✦(cobalt oxide)

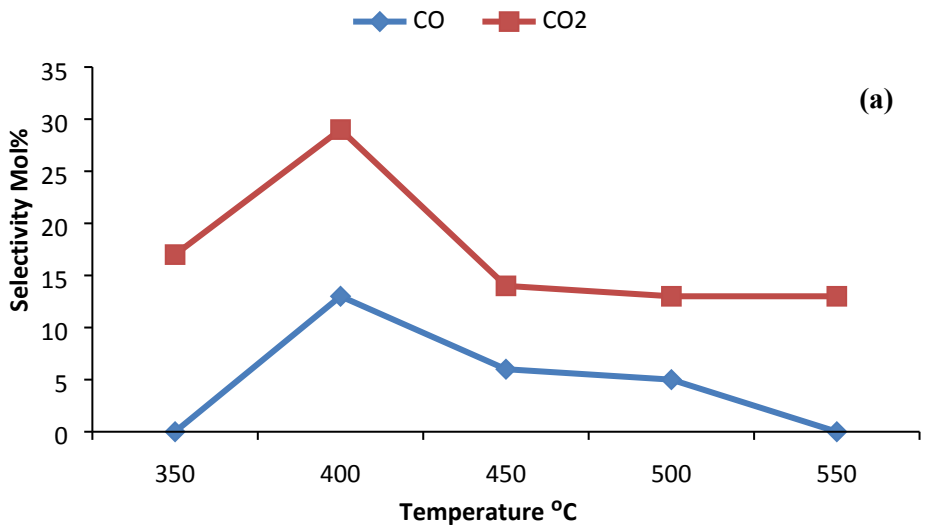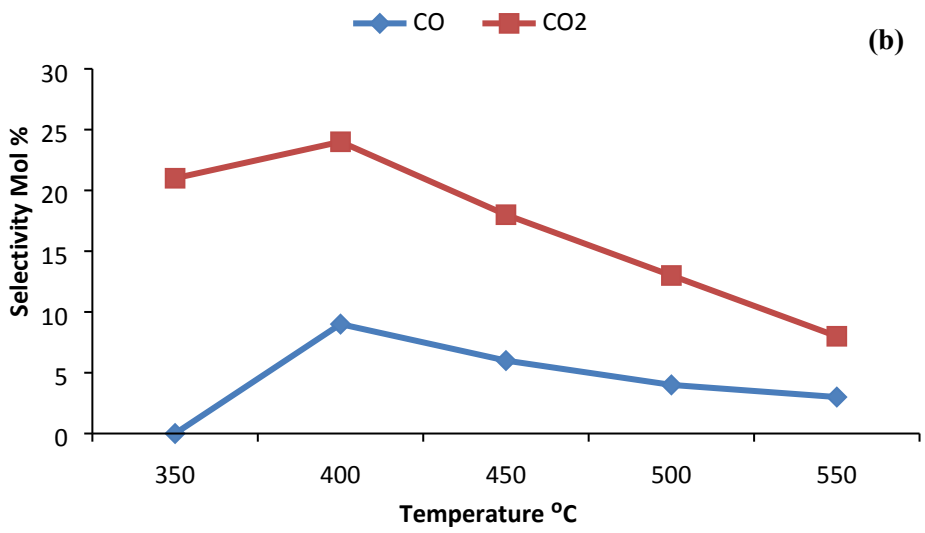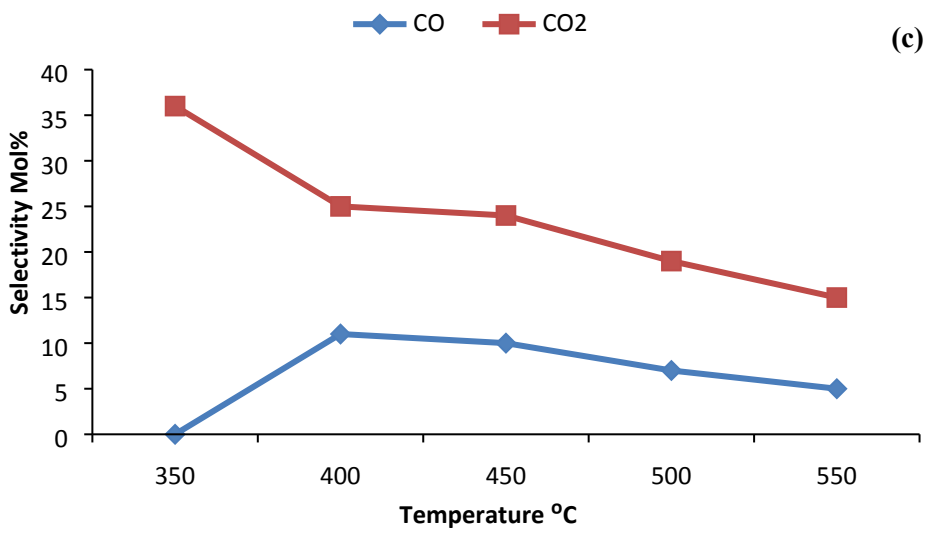

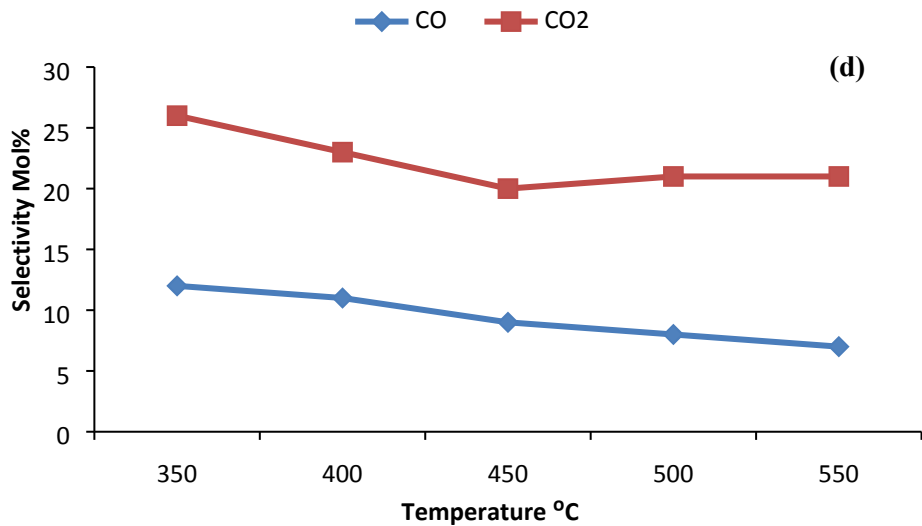

S 3: The effect of the oxygen concentration in the ODH of *n*-octane on the ratio of CO and CO<sub>2</sub>, C:O 8:1 (a), 8:2 (b), 8:3 (c) and 8:4 (d)

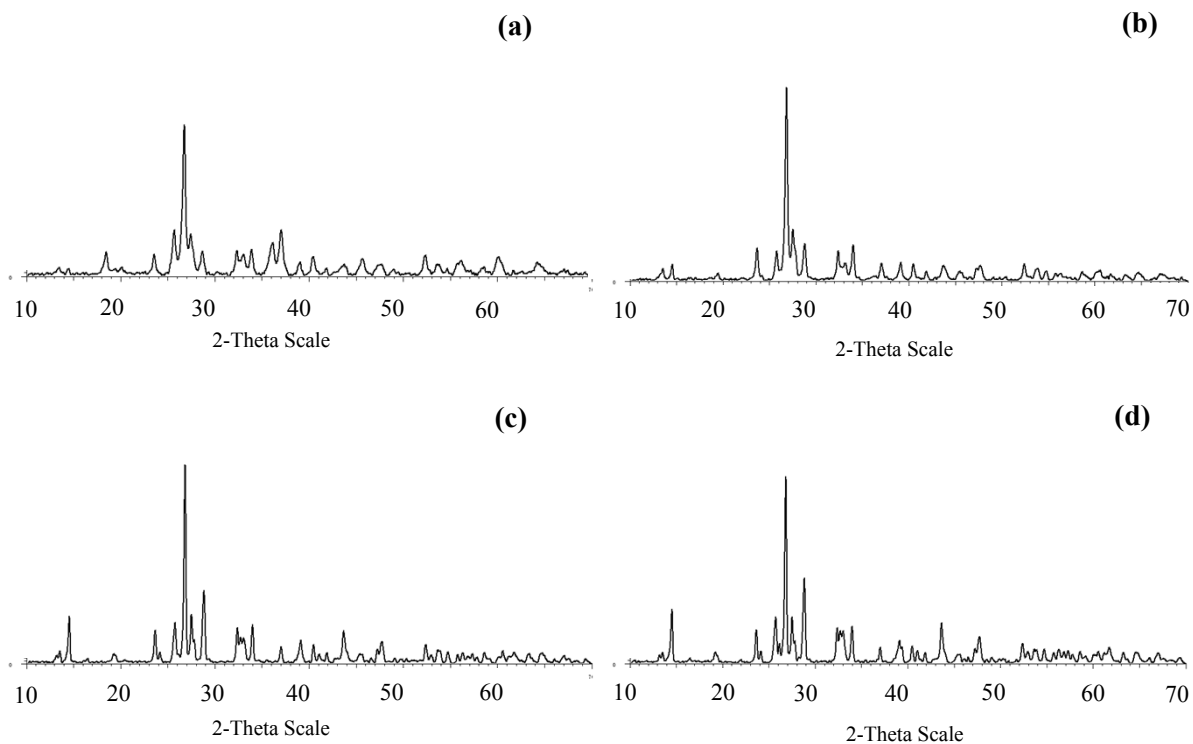

S4: XRD patterns of the used catalysts tested under different oxygen content in the activation of the *n*-octane at a GHSV of 4000 h<sup>-1</sup>, a (8:1), b (8:2), c (8:3) and d (8:4).
